# Supplementary material for: The effect of electrolytes on the electrochromic performance of nickel-substituted tungstophosphate and TiO2 nanowire composite films
Source: Royal Society of Chemistry journal article supplement (doi:10.1039/d1nj00512j), 2021-01-01
Supplement: d1nj00512j1.pdf [file d1nj00512j1.pdf]

# New Journal of Chemistry

## Supplementary information

### The effect of electrolytes on the electrochromic performance of nickel-substituted tungstophosphate and TiO<sub>2</sub> nanowires composite film

Shuping Liu<sup>a\*</sup>, Xiaowen Su<sup>a</sup>, Dongxue Chu<sup>b</sup>, Chao Ma<sup>b</sup>, Yu Fu<sup>b</sup>, Xiaoshu Qu<sup>b</sup>, Jiahui Lu<sup>a</sup>, Huanan Guan<sup>a</sup>

<sup>a</sup>College of Tourism and Cuisine, Harbin University of Commerce, Harbin City, 150028, P. R. China. <sup>b</sup>JiLin Institute of Chemical Technology, JiLin City, 132073, P. R. China.

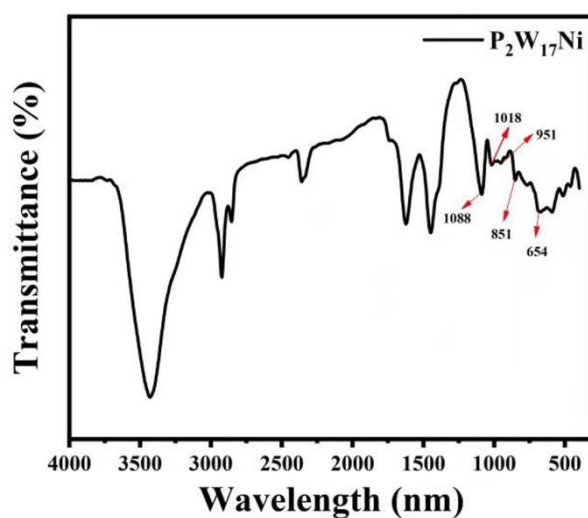

Figure S1. The IR spectra of P<sub>2</sub>W<sub>17</sub>Ni.

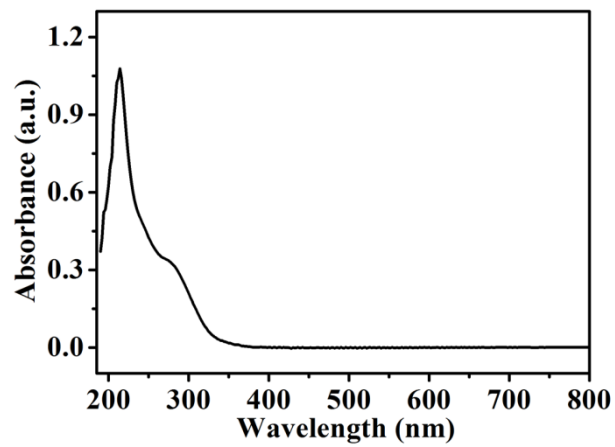

Figure S2. The UV-vis spectra of  $P_2W_{17}Ni$  solution.

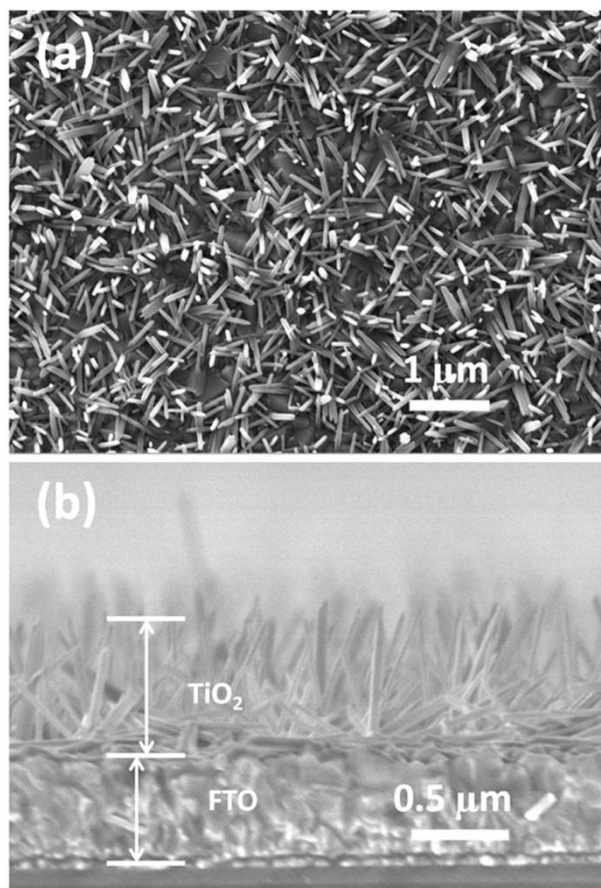

Figure S3. (a) Top-view SEM and (b) cross-section SEM images of  $TiO_2$  nanowires.

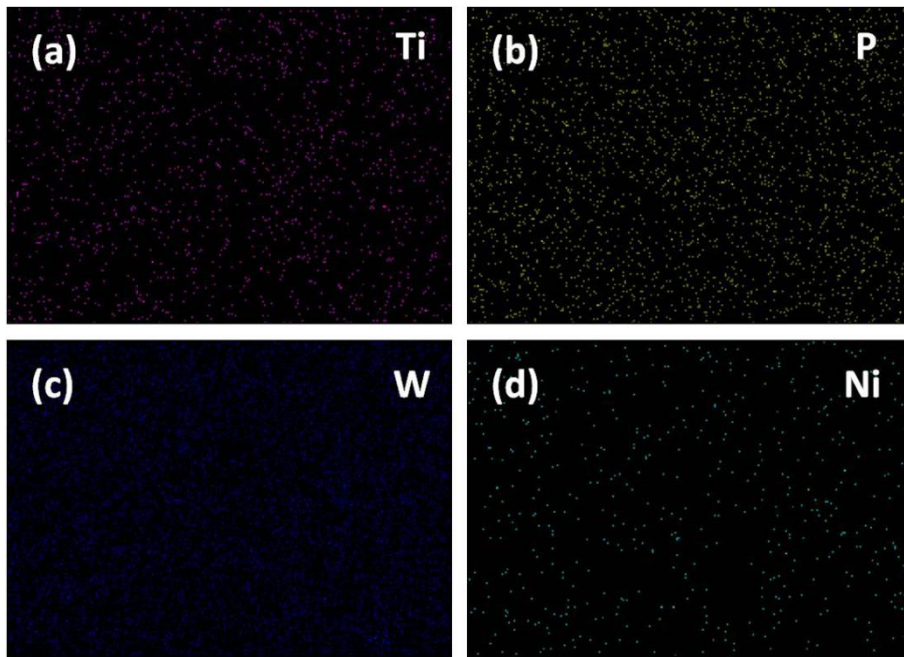

Figure S4. (a-d) EDS mapping images of the  $\text{TiO}_2\text{-P}_2\text{W}_{17}\text{Ni}$  film for Ti, P, W and Ni, respectively.

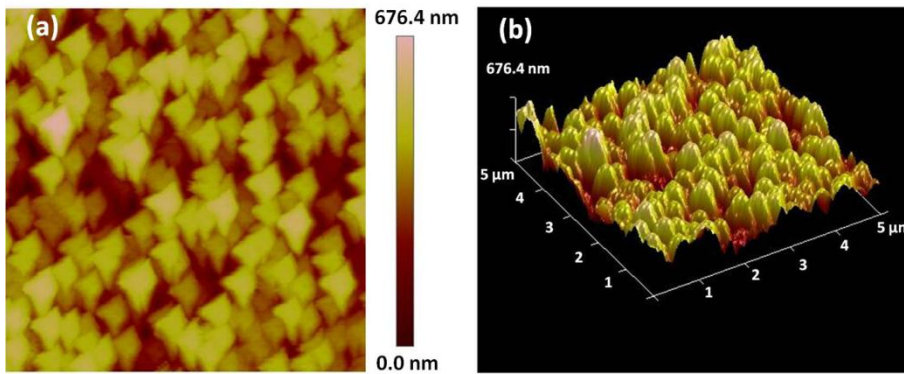

Figure S5. (a) 2D AFM and (b) 3D AFM images of  $\text{TiO}_2$  nanowires.

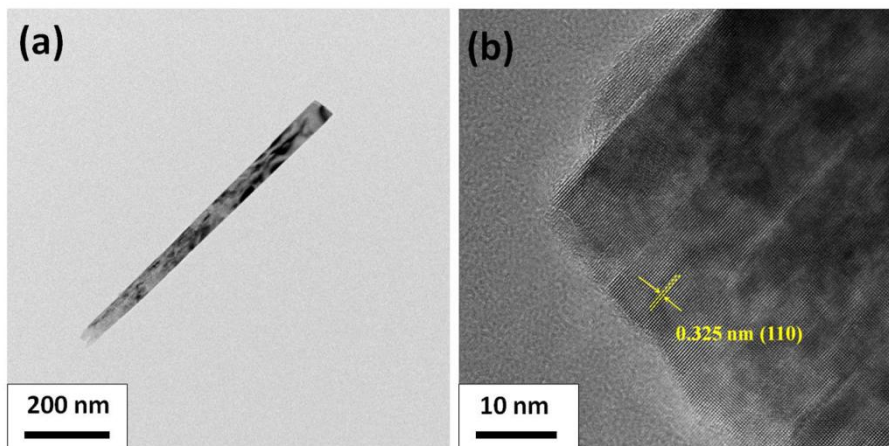

Figure S6. (a) TEM and (b) HRTEM images of TiO<sub>2</sub> nanowires.

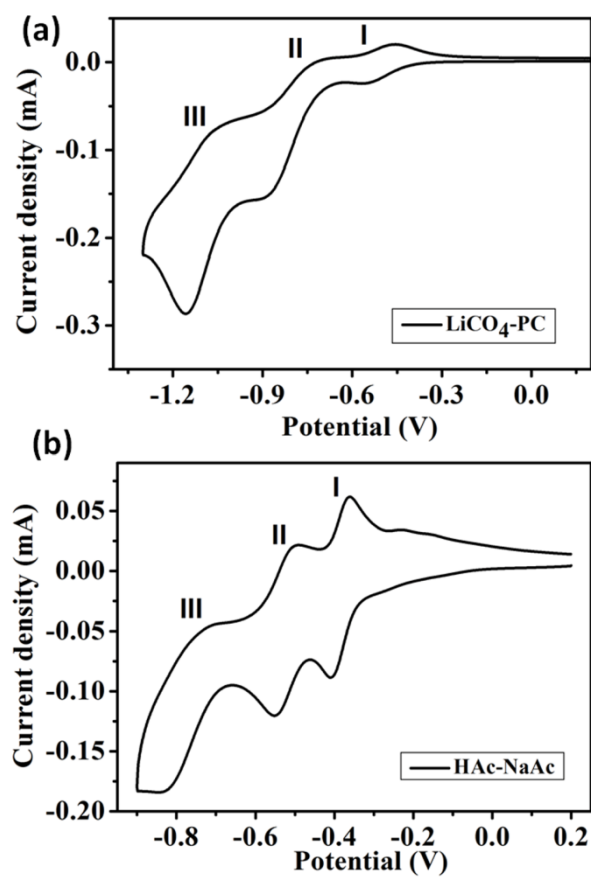

Figure S7. CV curves of P<sub>2</sub>W<sub>17</sub>Ni in (a) LiClO<sub>4</sub>-PC solution and (b) HOAc-NaAc buffer solution (pH = 3.5).
